# Supplementary material for: The impact of structural error on parameter constraint in a climate model
Source: Copernicus journal article supplement (doi:10.5194/esd-2016-17), 2016-04-29
Supplement: Supplementary file 1 [file esd-2016-17-supplement.pdf]

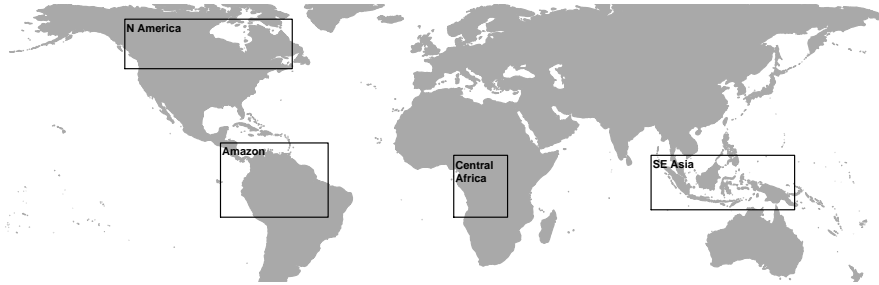

**Figure 1.** A map of the forest regions used in the study. Regions are: Amazon 15°S - 15°N, 270°E - 315°E; Central Africa; 15°S - 10°N, 7.5°E - 30°E; SE Asia 12°S - 10°N, 90°E - 150°E; North America 45°N - 65°N, 230°E - 300°E.

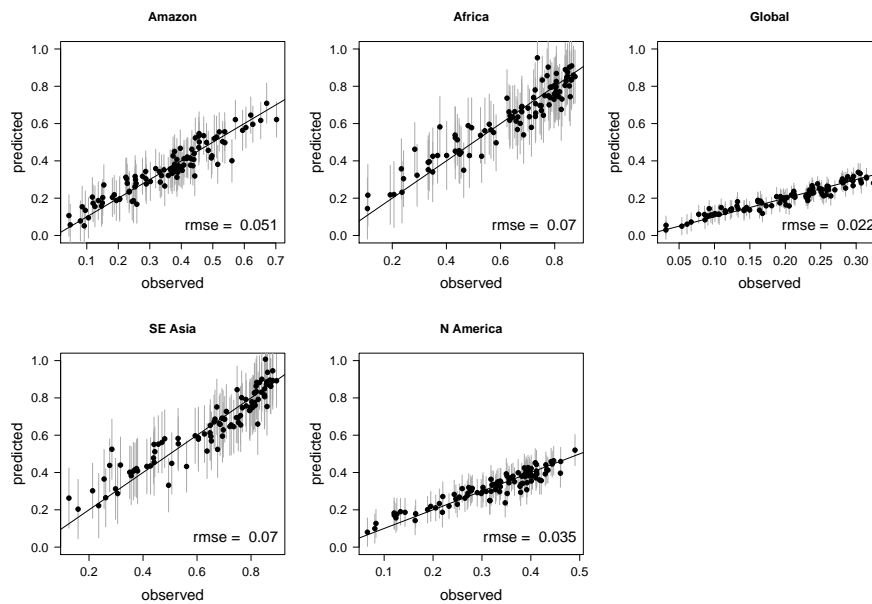

**Figure 2.** Leave-one-out cross validation performance of the emulator, when reproducing each forest fraction. Black points represent the emulator central estimate of a held-out point, with grey lines representing  $\pm 2$  standard deviations.
